# Supplementary material
Source: ML conference proceedings conference paper supplement (https://proceedings.neurips.cc/paper_files/paper/2017/hash/028ee724157b05d04e7bdcf237d12e60-Abstract.html)
Supplement: Supplementary file [file 028ee724157b05d04e7bdcf237d12e60-Supplemental.zip]

---

# Supplementary Materials: Saliency-based Sequential Image Attention with Multiset Prediction

---

**Sean Welleck**  
New York University  
wellecks@nyu.edu

**Jialin Mao**  
New York University  
jialin.mao@nyu.edu

**Kyunghyun Cho**  
New York University  
kyunghyun.cho@nyu.edu

**Zheng Zhang**  
New York University  
zz@nyu.edu

## 1 Additional Implementation Details

The meta-controller and controller encode their input to 128 and 512-dimensional vectors, respectively, and use a GRU with hidden sizes 128 and 512, respectively. The Gaussian attention uses 5 components, with each  $\beta$  constrained to  $[1.5, 2.0]$ . The priority maps and the input saliency map are normalized to have maximum 1 and minimum 0. The number of glimpses  $k$  is fixed to 2. The classification scores and  $V(s_{t,i})$  are linear transformations of the GRU hidden state. Action scores are computed from the GRU hidden state with a 1 layer MLP with hidden dimension 64.  $V(s_{t,i})$  is trained to minimize MSE with the observed reward. The gradients of the action score MLP and state-value linear transformation are detached from the rest of the model during back-propagation. To accelerate training, a supervised cross-entropy loss was added to HSAL-RL for stop-class prediction. That is, for a label set of cardinality  $m$ , on the  $m + 1$ st meta-controller step a cross-entropy loss is attached to the controller's softmax probabilities, using the "stop" label as the ground-truth label for the loss.

## 2 Training Curves

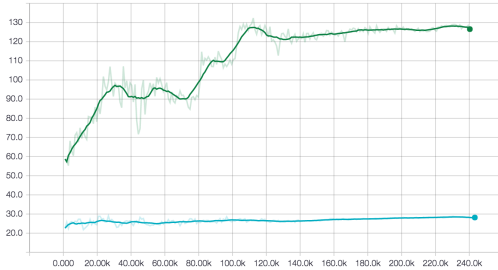

Figure 1:  $\text{attn}_{\text{saliency}}$  for the controller's glimpses over the course of training for HSAL-RL (green) and the baseline (teal) on the MNIST Multiset task.

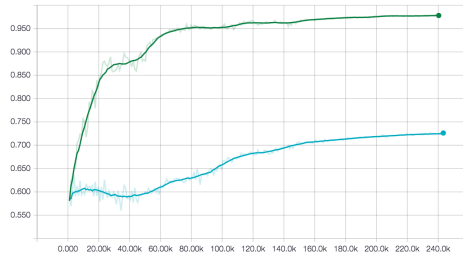

Figure 2: Macro-F1 for HSAL-RL (green) and the baseline (teal) on the MNIST Multiset task over the course of training. OP, OR, 0-1 metrics have an analogous shape.

## 3 Architecture Diagrams

Below are detailed diagrams for the full architecture and individual components.

### 3.1 Full Architecture

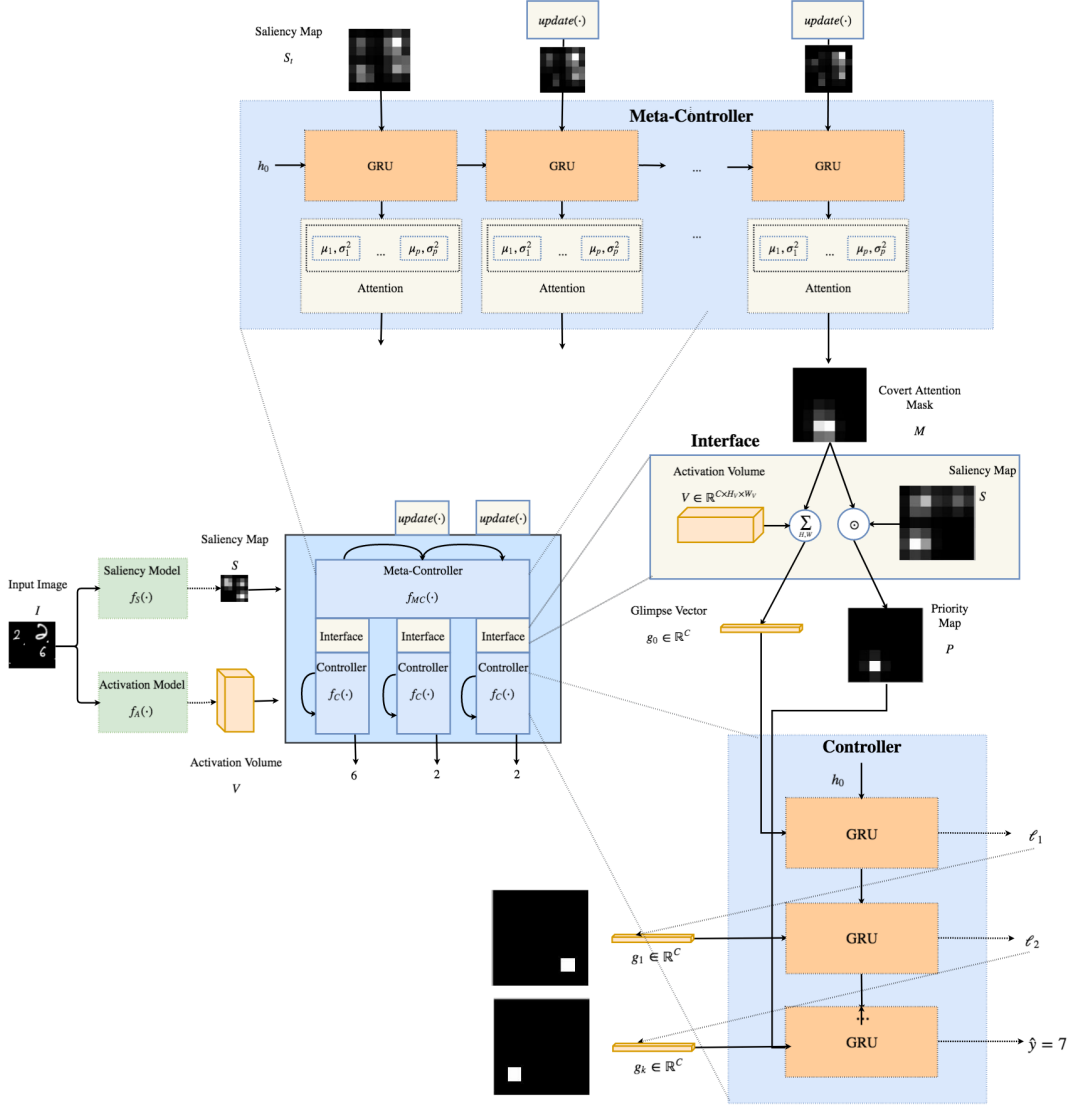

Figure 3: The full architecture, expanded for one meta-controller time-step. As input to the system, an initial saliency map and activation volume are generated by the saliency model and activation models, respectively. At each meta-controller step, an updated saliency map is mapped to a covert attention mask. The interface forms an initial glimpse vector and priority map using the attention mask. Based on the priority map and initial glimpse vector, the controller chooses  $k$  glimpse locations, then classifies. Note that  $k + 1$  controller steps occur for every meta-controller step.

### 3.2 Meta-Controller

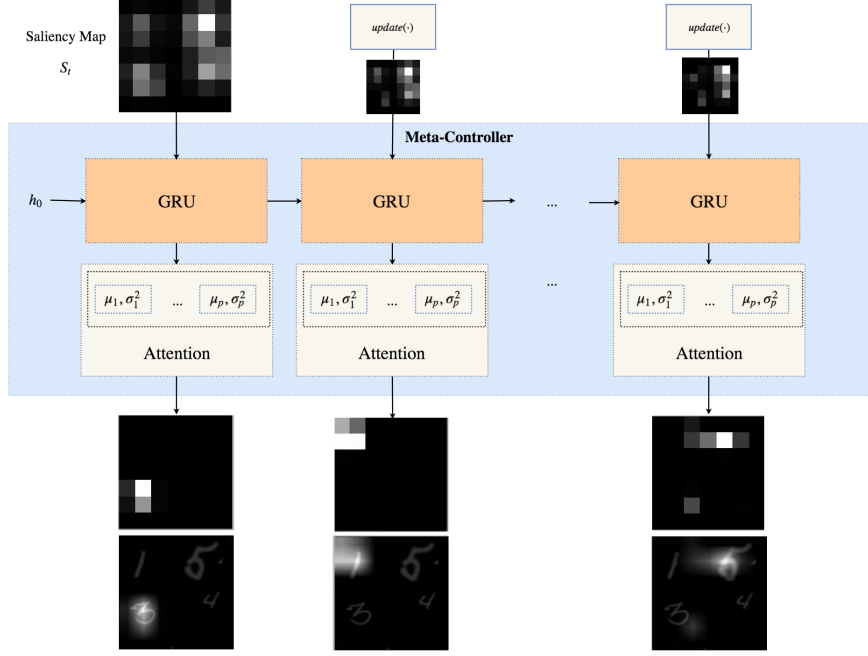

Figure 4: An implementation of the meta-controller.

### 3.3 Update

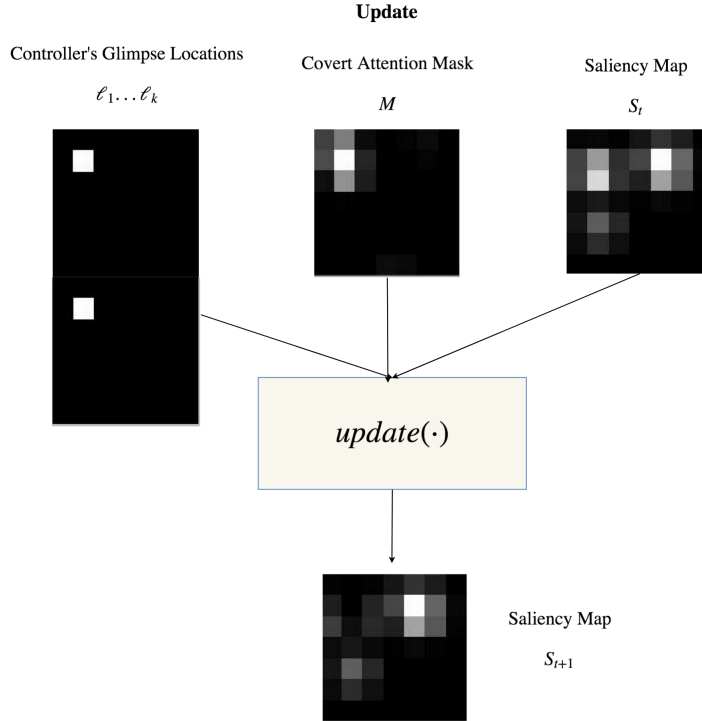

Figure 5: A conceptual diagram of the  $update(\cdot)$  function.

### 3.4 Interface

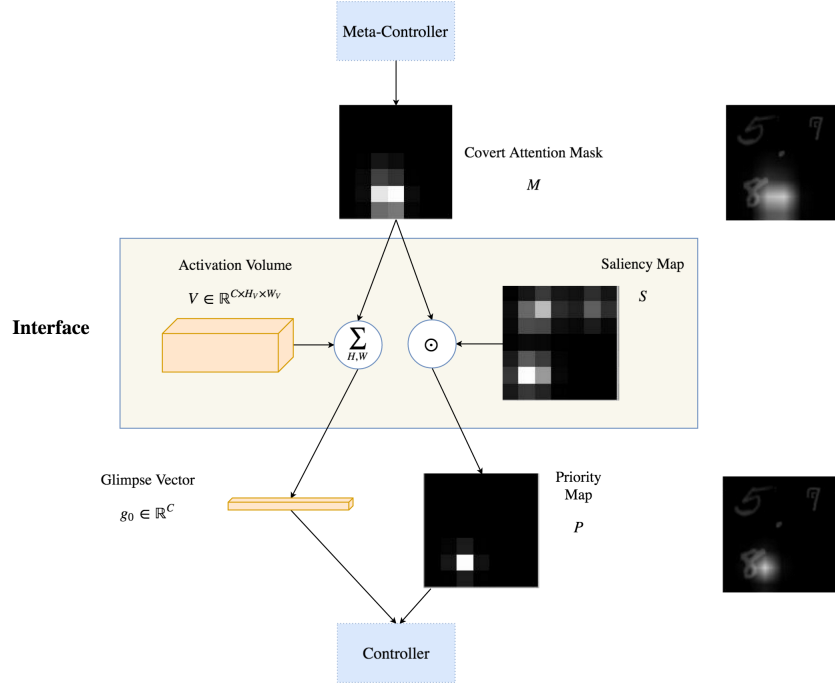

Figure 6: An implementation of the interface layer.

### 3.5 Controller

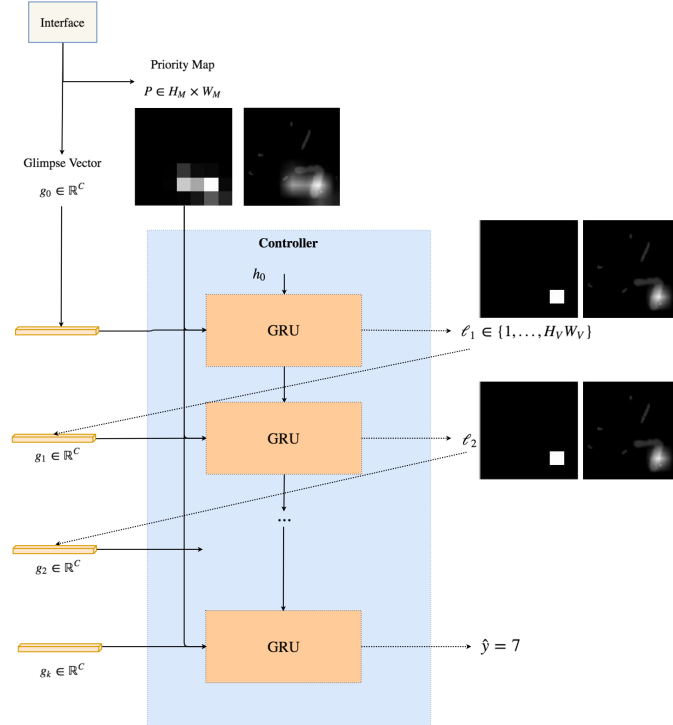

Figure 7: An implementation of the controller.

## 4 Attention Visualizations

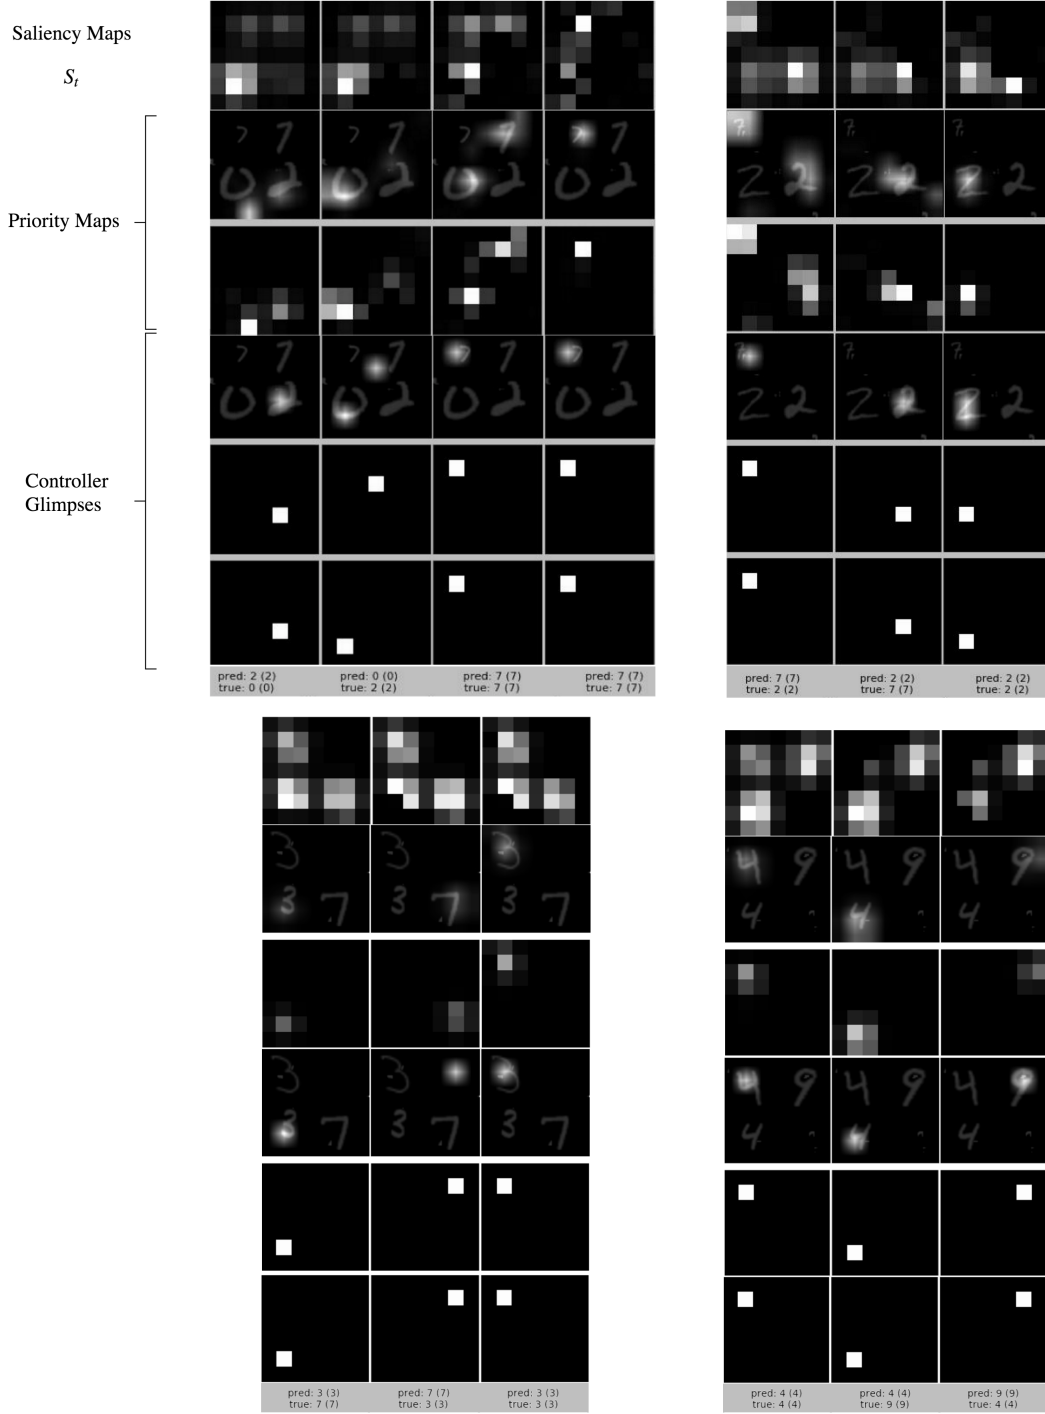

Figure 8: Additional hierarchical attention visualizations, discussed in the Experimental Evaluation.
